# Supplementary material for: Distinct roles for innexin gap junctions and hemichannels in mechanosensation
Source: eLife journal article supplement (doi:10.7554/elife.50597), 2020-01-29
Supplement: supp [file elife-50597-supp-v1.zip]

Archive with 12 entries (12 files):
- elife_poa_e50597_Figure_5_figure_supplement_5.pdf
- elife_poa_e50597_Figure_5_figure_supplement_4.pdf
- elife_poa_e50597_Figure_5_figure_supplement_2.pdf
- elife_poa_e50597_Supplementary_file_1.docx
- elife_poa_e50597_Figure_3_figure_supplement_1.pdf
- elife_poa_e50597_Figure_5_figure_supplement_3.pdf
- elife_poa_e50597_Source_code_2.rar
- elife_poa_e50597_Figure_2_figure_supplement_1.pdf
- elife_poa_e50597_Transparent_Reporting_File.docx
- elife_poa_e50597_Figure_5_figure_supplement_1.pdf
- elife_poa_e50597_Source_code_1.zip
- elife_poa_e50597_Figure_2_figure_supplement_2.pdf
