# Supplementary figures and images for: Distinct roles for innexin gap junctions and hemichannels in mechanosensation
Source: eLife journal article supplement (doi:10.7554/elife.50597), 2020-01-29

Figure 5 supplement 5 Walker & Schafer

Behavioural response to anterior gentle body touch

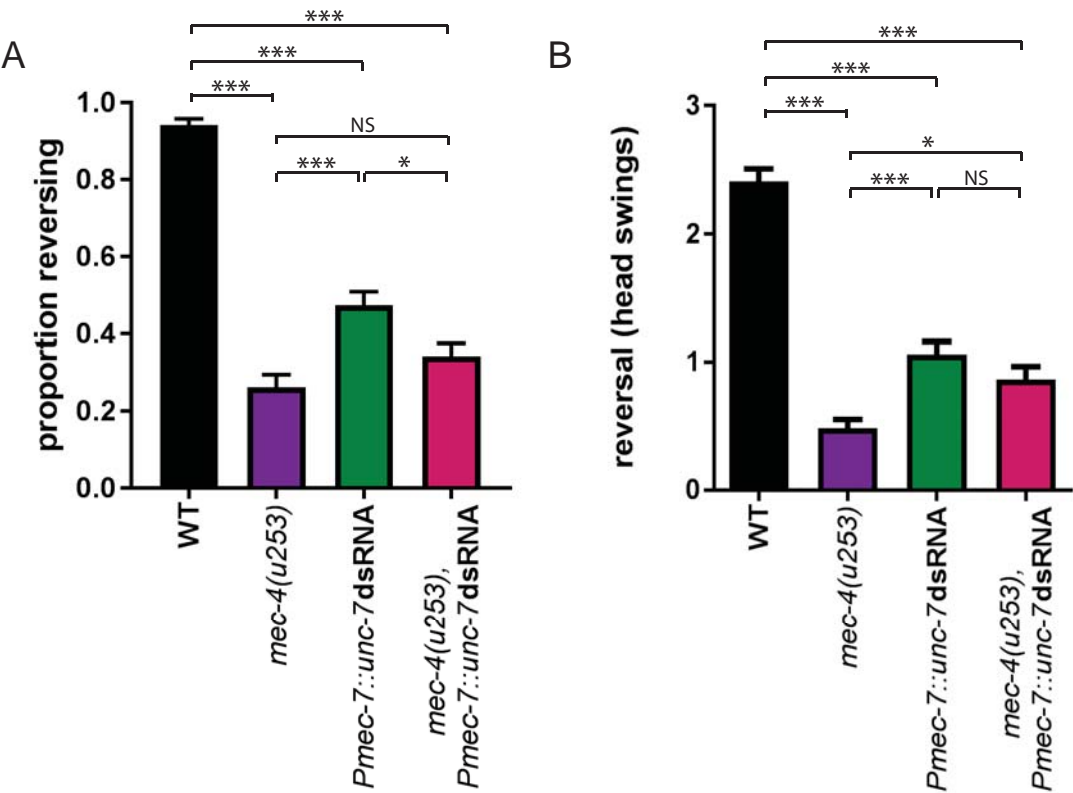

Supplement: supp [file elife-50597-supp-v1.zip › elife_poa_e50597_Figure_5_figure_supplement_5.pdf]

Figure 5 supplement 4 Walker & Schafer

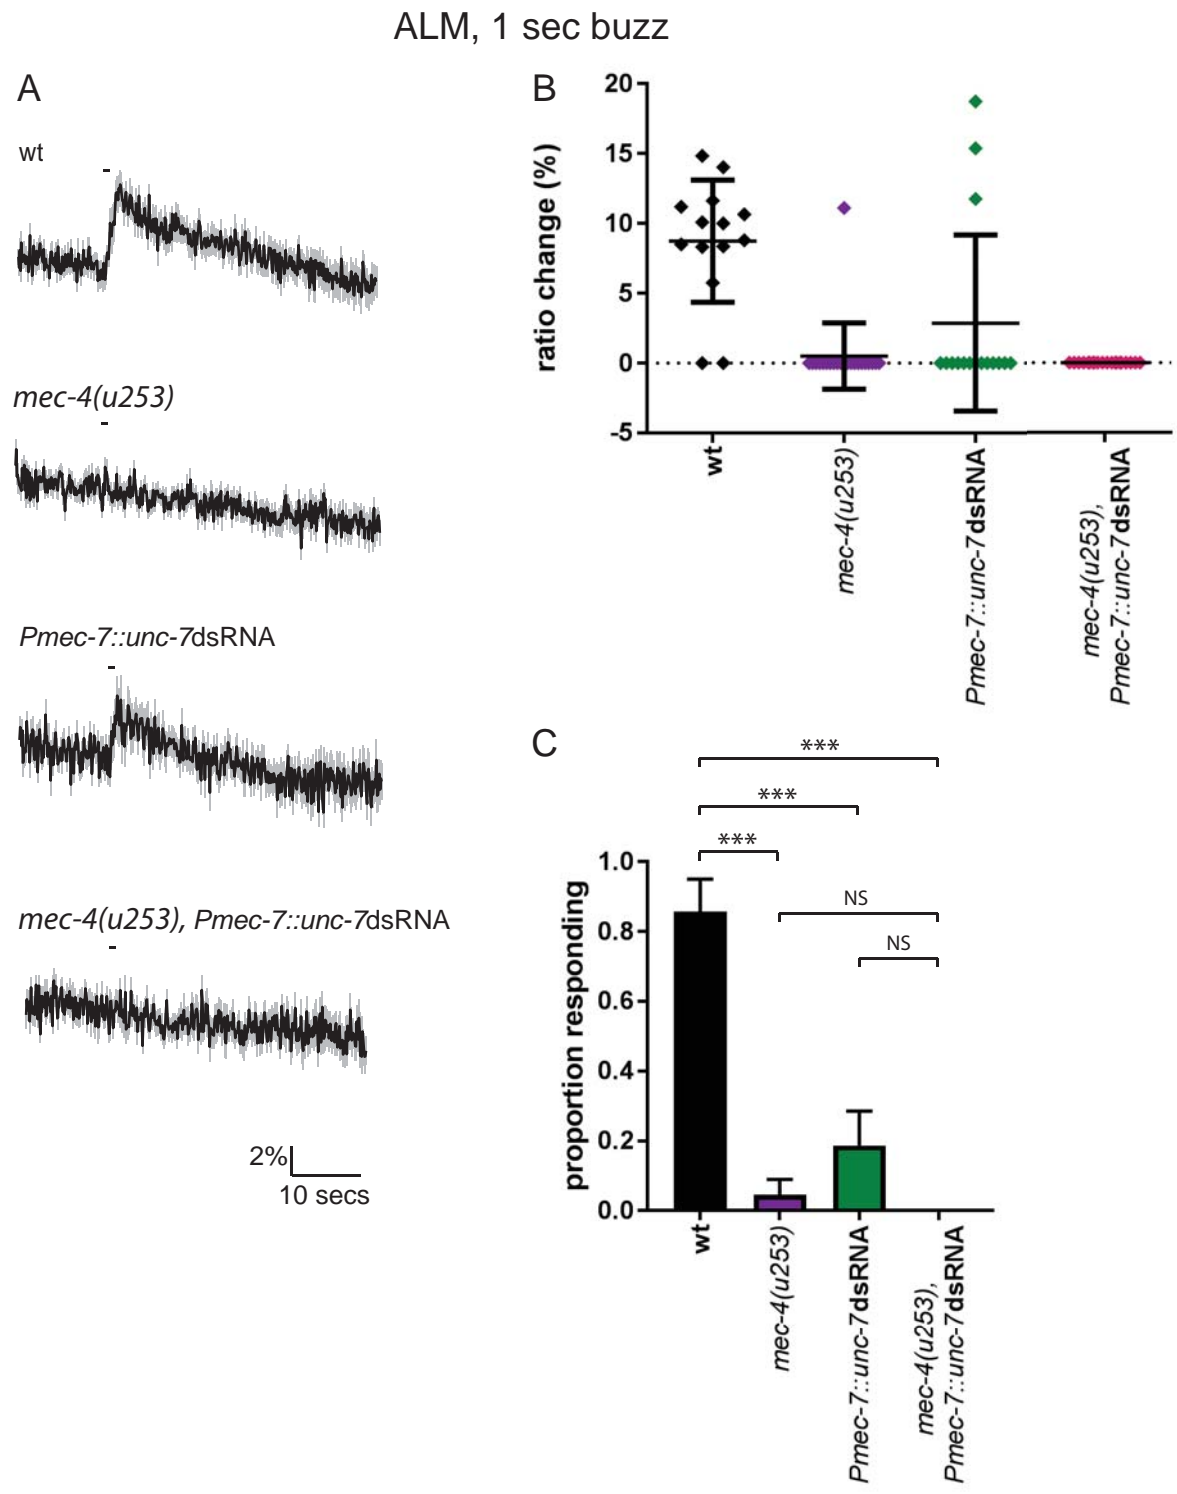

Supplement: supp [file elife-50597-supp-v1.zip › elife_poa_e50597_Figure_5_figure_supplement_4.pdf]

Figure 5 supplement 2 Walker & Schafer

ALM harsh touch - *mec-4(u253)*

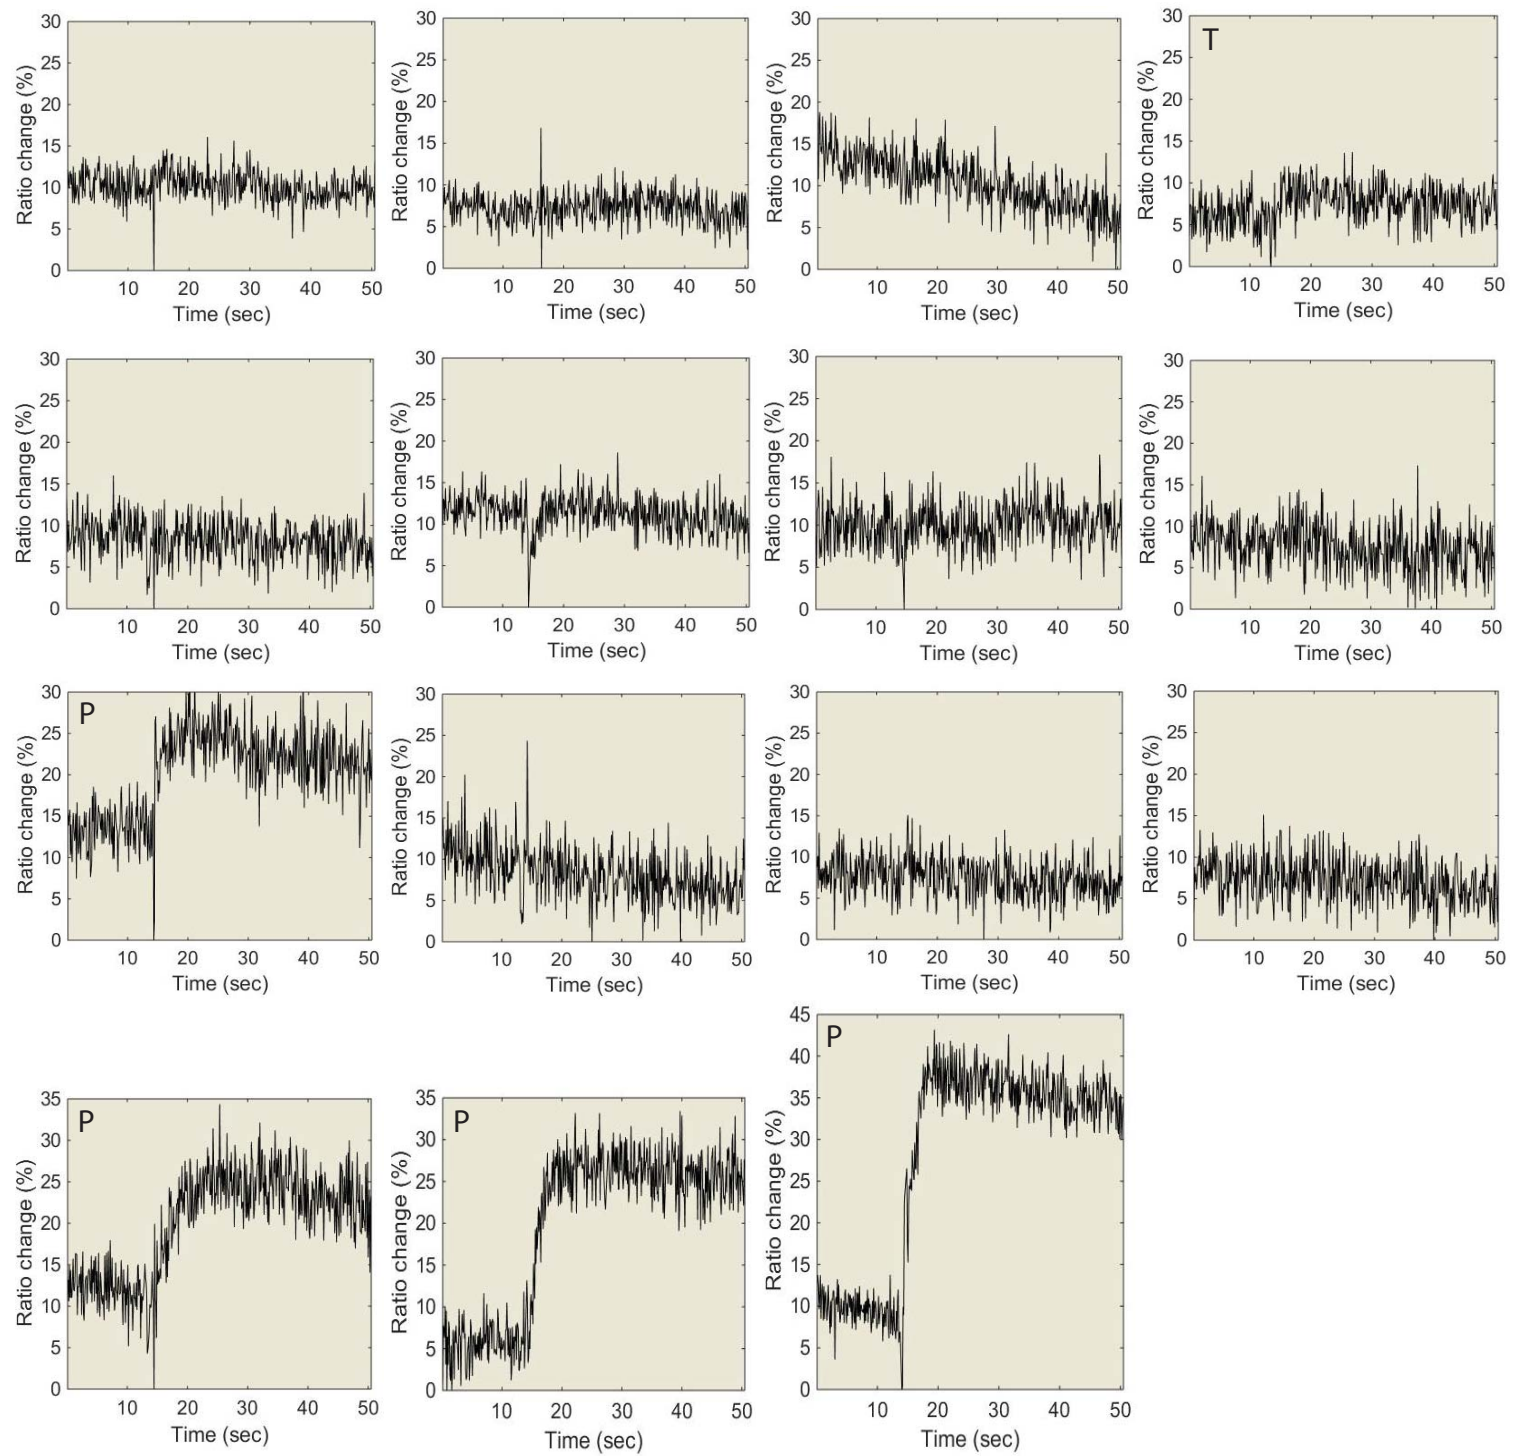

Supplement: supp [file elife-50597-supp-v1.zip › elife_poa_e50597_Figure_5_figure_supplement_2.pdf]

Figure 3- figure supplement 1 Walker & Schafer

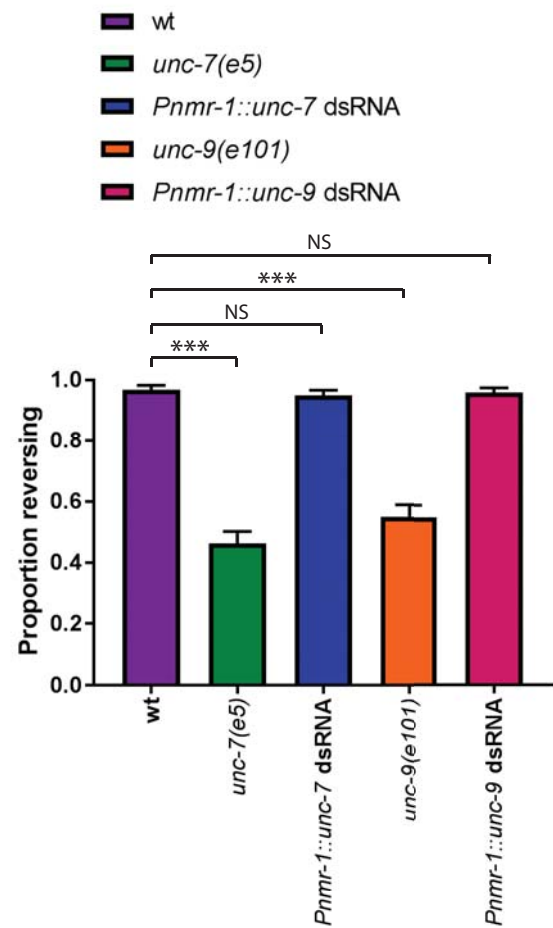

Supplement: supp [file elife-50597-supp-v1.zip › elife_poa_e50597_Figure_3_figure_supplement_1.pdf]

Figure 5 supplement 3 Walker & Schafer

ALM harsh touch - *Pmec-4::unc-7dsRNA*

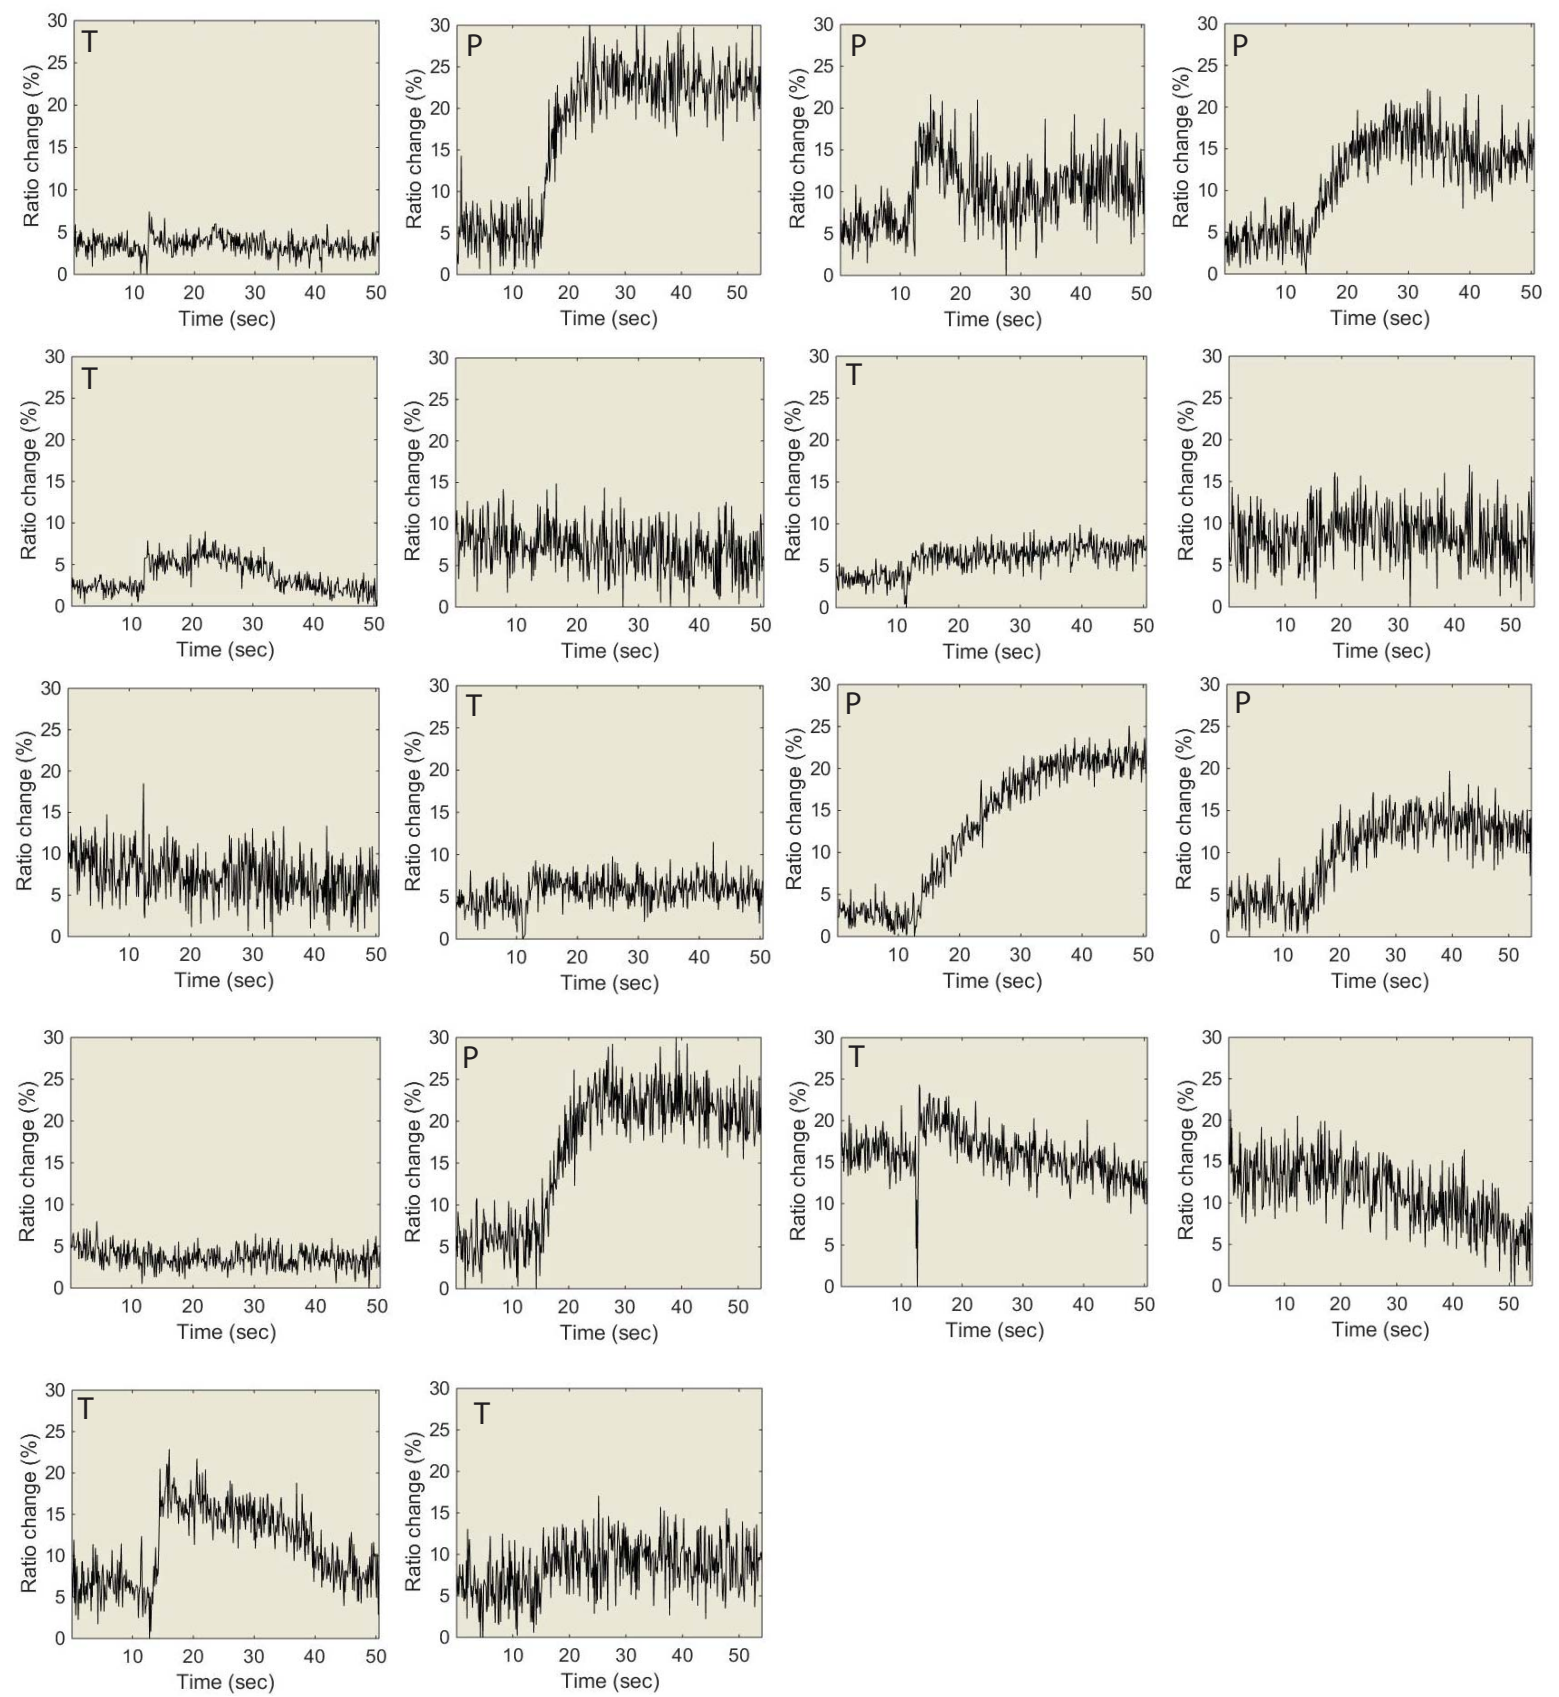

Supplement: supp [file elife-50597-supp-v1.zip › elife_poa_e50597_Figure_5_figure_supplement_3.pdf]

Figure 2 supplement 1 Walker &amp; Schafer

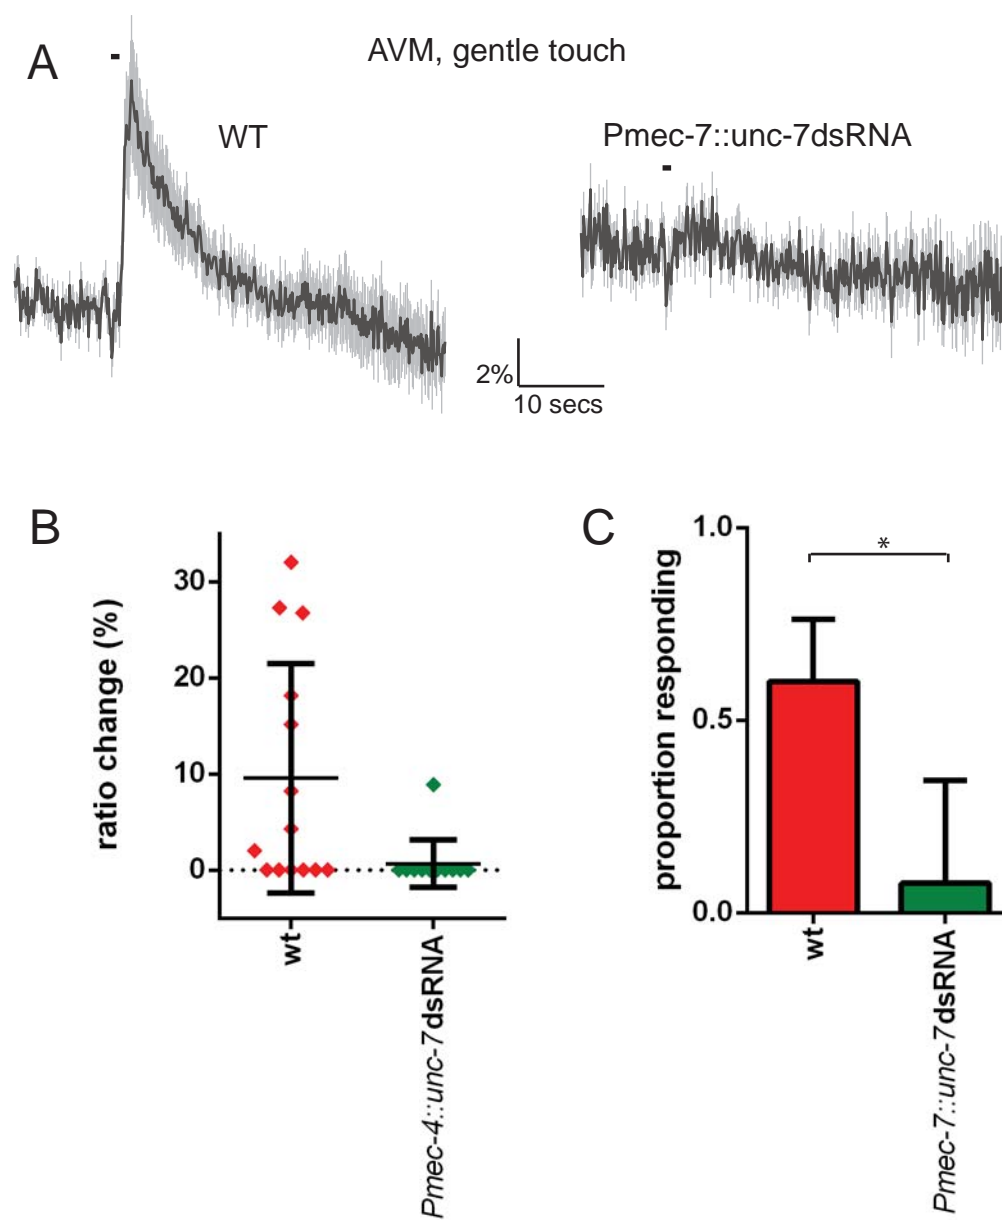

Supplement: supp [file elife-50597-supp-v1.zip › elife_poa_e50597_Figure_2_figure_supplement_1.pdf]

Figure 5 supplement 1 Walker & Schafer

ALM harsh touch - wild type

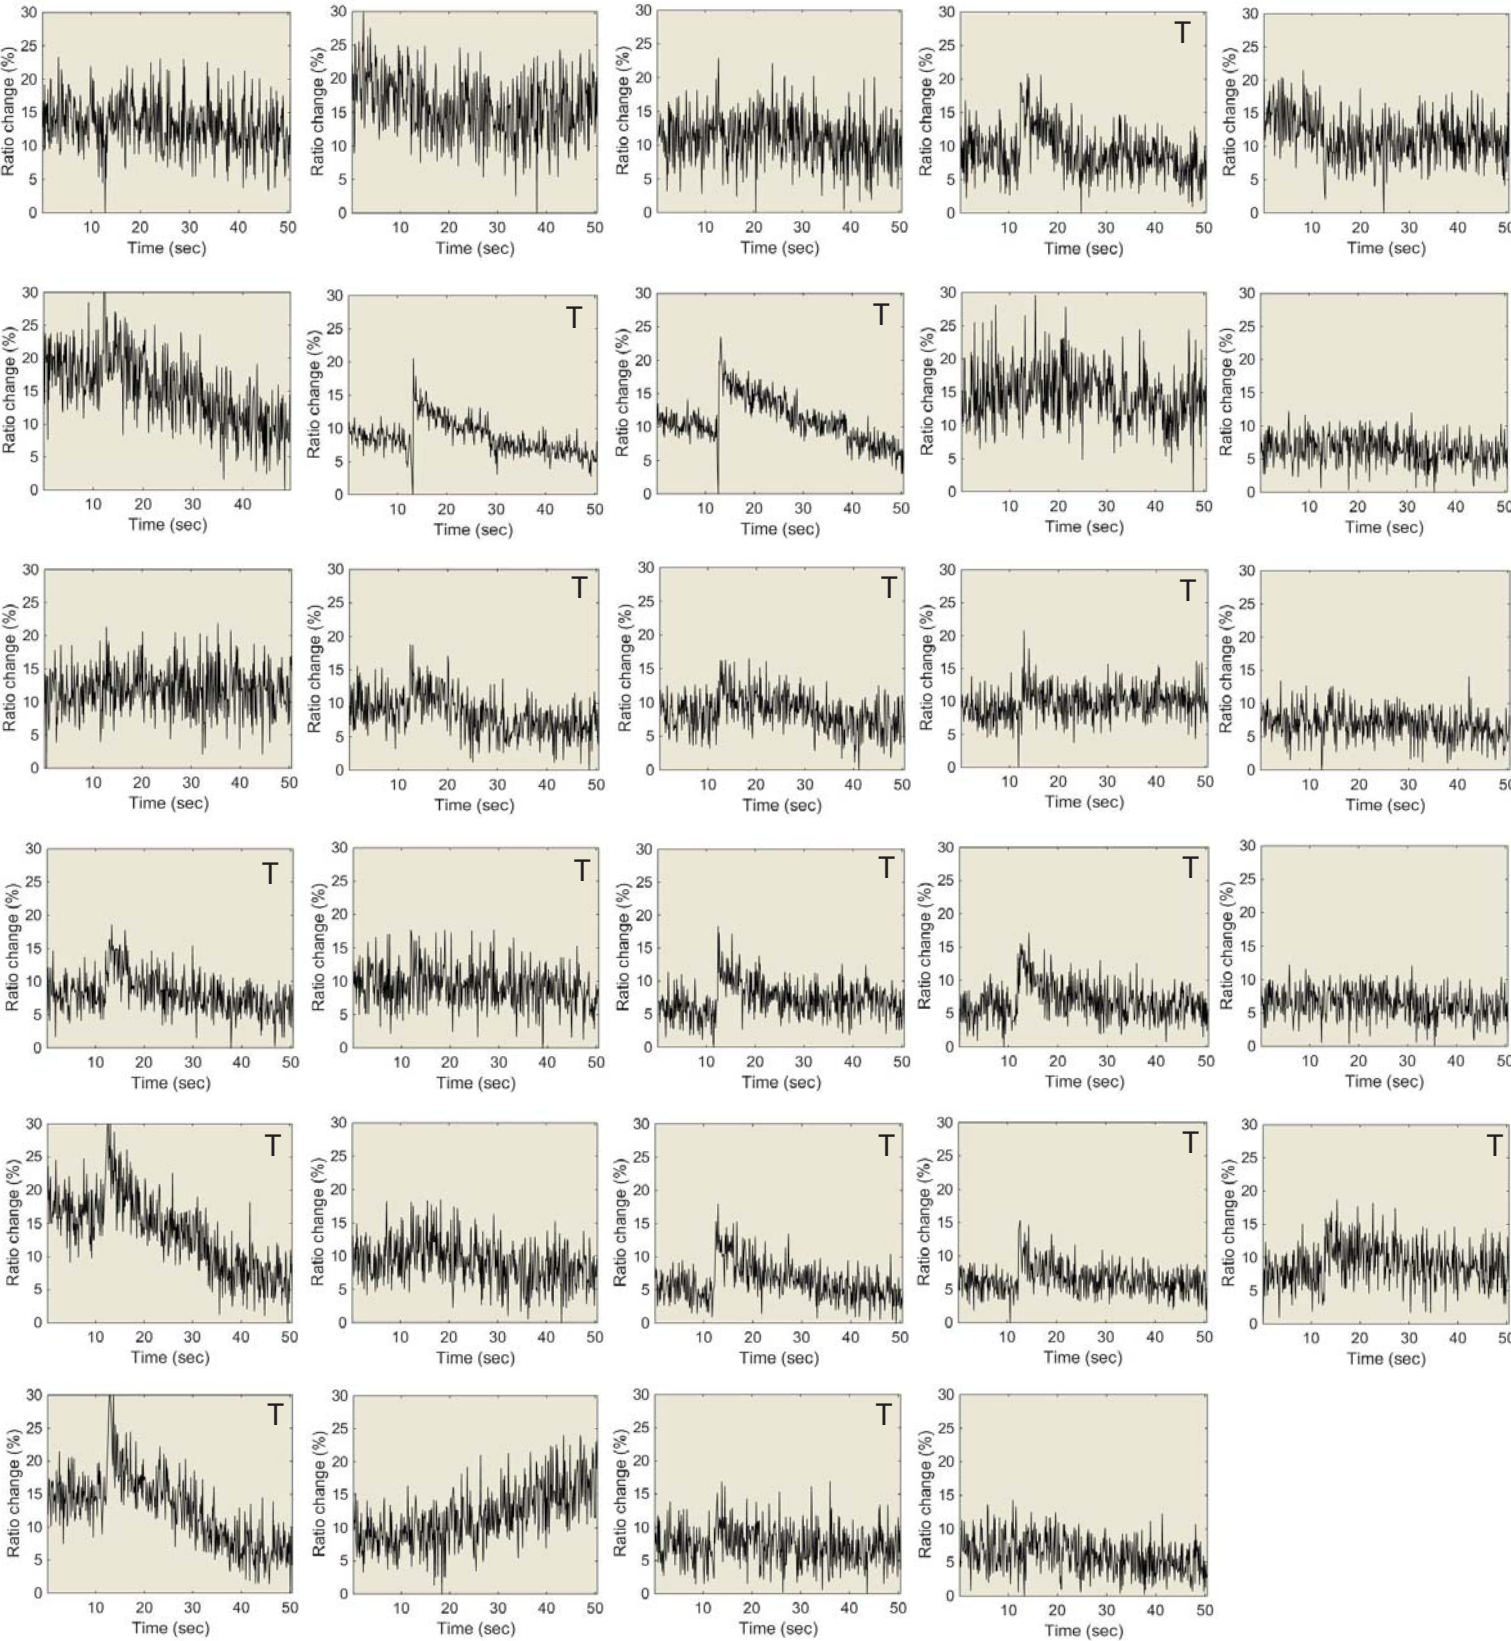

Supplement: supp [file elife-50597-supp-v1.zip › elife_poa_e50597_Figure_5_figure_supplement_1.pdf]

Figure 2 supplement 2 Walker & Schafer

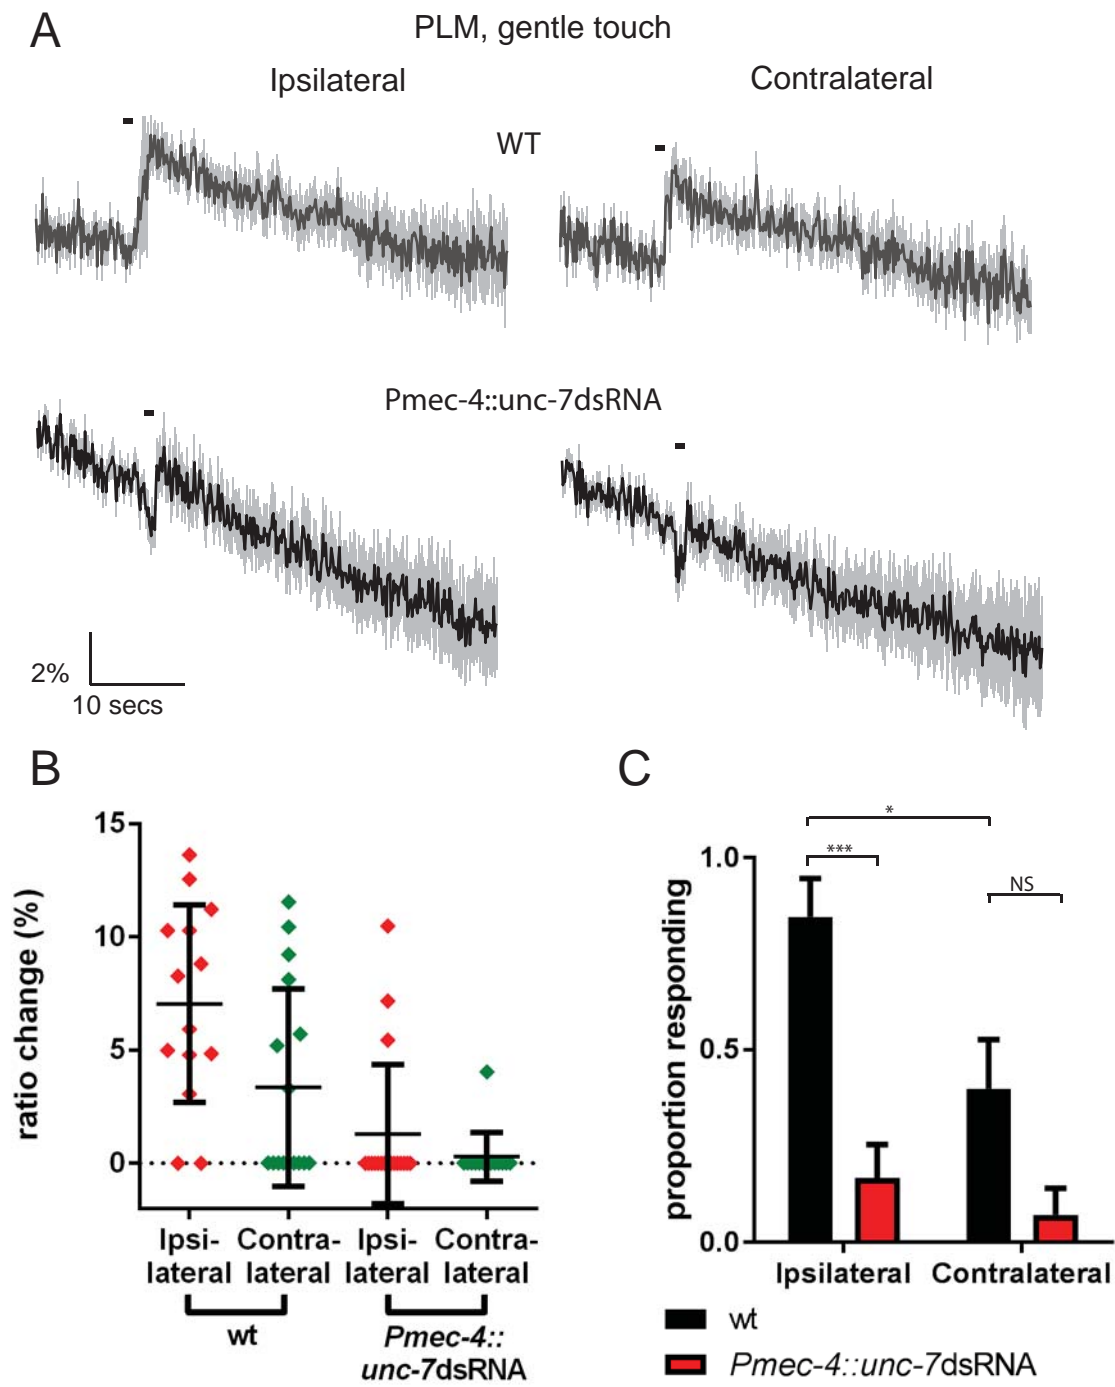

Supplement: supp [file elife-50597-supp-v1.zip › elife_poa_e50597_Figure_2_figure_supplement_2.pdf]
